# Supplementary material for: Analyzing the Role of Specific Damage-Associated Molecular Patterns-Related Genes in Osteoarthritis and Investigating the Association between β-Amyloid and Apolipoprotein E Isoforms
Source: PubMed Central journal article supplement — J Innate Immun. 2024 Oct 29;16(1):501–12. doi: 10.1159/000541542 (PMC11521507; doi:10.1159/000541542), 2024-10-29

**a**

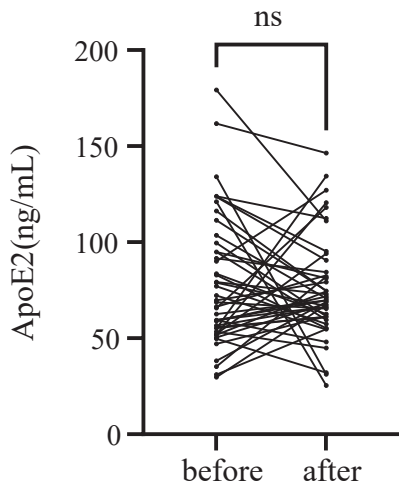

**b**

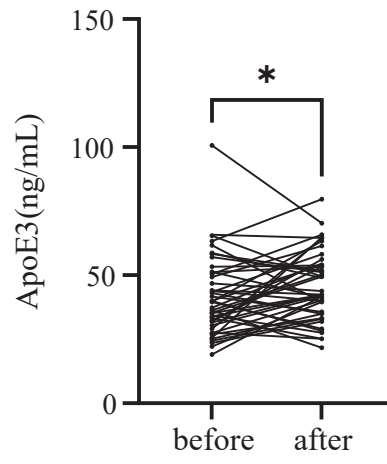

**c**

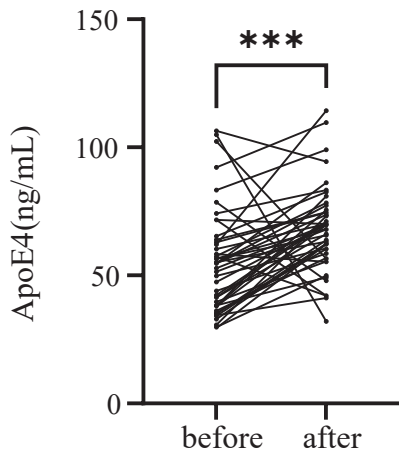

**d**

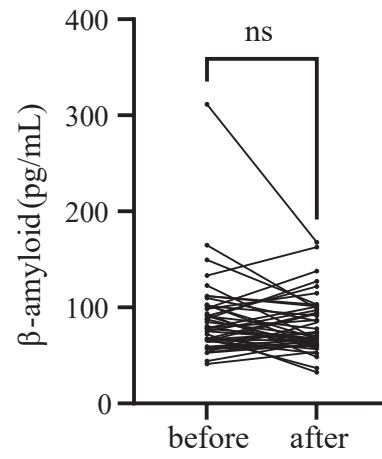

Supplement: Supplementary_material-Suppl.5-s5.pdf [file Supplementary_material-Suppl.5-s5.pdf]
